# Supplementary material
Source: MDPI journal article supplement (https://www.mdpi.com/2073-4344/14/5/299)
Supplement: s1 [file s1]

# Insights into the Reactivation Process of Thermal Aged Bimetallic Pt-Pd/CeO<sub>2</sub>-ZrO<sub>2</sub>-La<sub>2</sub>O<sub>3</sub> Catalysts at Different Treating Temperatures and Their Structure–Activity Evolutions for Three-Way Catalytic Performance

| Item      | Page |
|-----------|------|
| Figure S1 | 1    |
| Figure S2 | 1    |
| Table S1  | 2    |

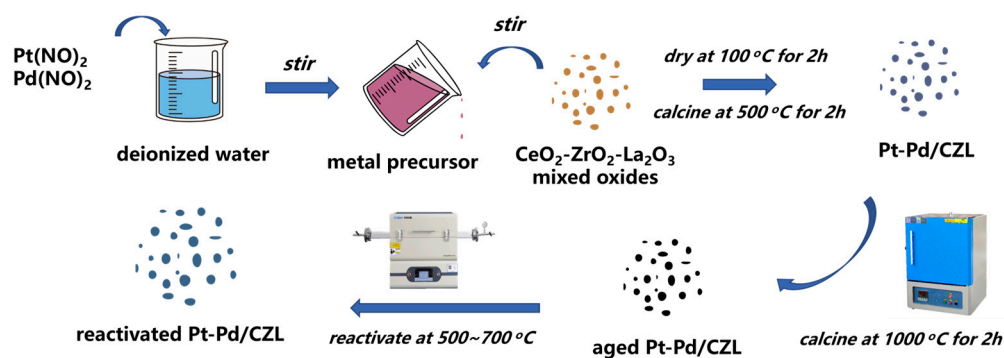

**Figure S1.** Synthesis scheme of the Pt-Pd/CZL catalysts.

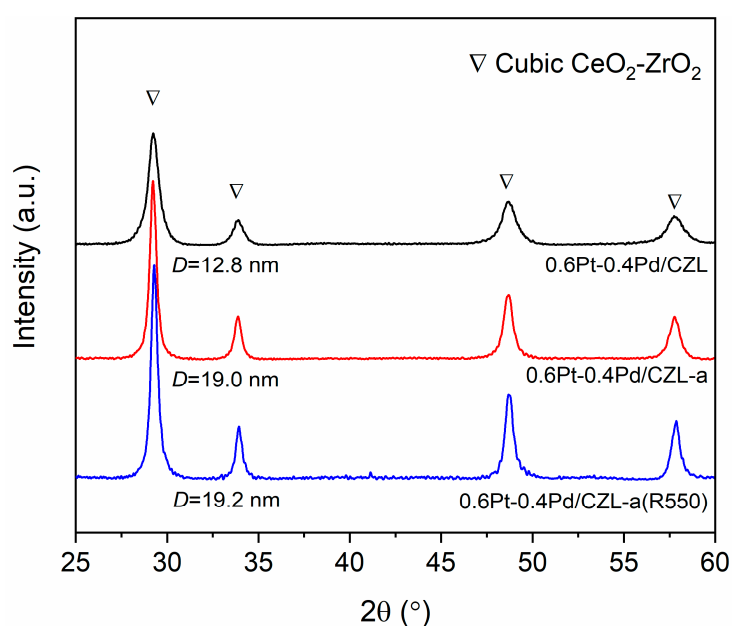

**Figure S2.** XRD patterns of the 0.6Pt-0.4Pd/CZL, 0.6Pt-0.4Pd/CZL-a, and 0.6Pt-0.4Pd/CZL-a(R550) catalysts.

**Table S1.** Comparison of the reactivation protocols and results in this work with other reports.

| Catalysts                                               | Ageing conditions         | Reactivation process                                                             | Activity<br>(Fresh/Aged/Reactivated)                                                                                                                      | Referenecs |
|---------------------------------------------------------|---------------------------|----------------------------------------------------------------------------------|-----------------------------------------------------------------------------------------------------------------------------------------------------------|------------|
| Pd/Ce <sub>0.68</sub> Zr <sub>0.32</sub> O <sub>2</sub> | 900 °C in exhaust 5h      | Oxidize at 900 °C 15 min,<br>cooled in O <sub>2</sub> pulse to 200 °C            | CO T <sub>50%</sub> = 133/315/235 °C<br>NO T <sub>50%</sub> = 276/355/337 °C<br>HC T <sub>50%</sub> = 250/325/267 °C                                      | [16]       |
| PtRh-CeZrAl                                             | 700 °C in air 3h          | Oxychlorination at 600 °C 2h                                                     | CO T <sub>50%</sub> ≈ NA/310/247 °C                                                                                                                       | [31]       |
| Pd/CeO <sub>2</sub> -Al <sub>2</sub> O <sub>3</sub>     | 850 °C in air             | oxy-chlorine at 500 °C 1h,<br>0.8 vol% Cl <sub>2</sub> /18 vol% O <sub>2</sub> / | CO T <sub>50%</sub> ≈ NA/220/185 °C                                                                                                                       | [32]       |
| PdRh commercial<br>TWCs                                 | 30000 km real-car driving | oxy-chlorine at 500 °C 1h,<br>0.8 vol% Cl <sub>2</sub> /18 vol% O <sub>2</sub> / | CO T <sub>50%</sub> ≈ NA/330/290 °C<br>NO T <sub>50%</sub> ≈ NA/285/280 °C<br>HC T <sub>50%</sub> ≈ NA/350/300 °C<br>CO T <sub>50%</sub> ≈ 132/182/167 °C | [33]       |
| Pt/CeZrLaPr                                             | 950 °C in exhaust 5h      | Oxidize at 800 °C 1h,                                                            | NO T <sub>50%</sub> ≈ 177/230/212 °C<br>HC T <sub>50%</sub> ≈ 182/237/215 °C                                                                              | [34]       |
| 0.6Pt- 0.4Pd/CZL-a<br>(R550)                            | 1000 °C in air 2h         | 550°C 2h<br>16% O <sub>2</sub> +10% H <sub>2</sub> O+10% CO <sub>2</sub>         | CO T <sub>50%</sub> = 180/225/207 °C<br>NO T <sub>50%</sub> = 208/289/240 °C<br>HC T <sub>50%</sub> = 197/241/238 °C                                      | this work  |
